# Supplementary material for: Diagnostic Errors in Obstetric Morbidity and Mortality: Methods for and Challenges in Seeking Diagnostic Excellence
Source: Preprints.org preprint supplement (doi:10.20944/preprints202406.1852.v1), 2024-06-26
Supplement: Supplementary file 1 [file supplementary]

| Research Method | Pros | Cons |
| --- | --- | --- |
| Clinicopathologic autopsy studies | - Provide objective pathologic cause of death to compare with clinical diagnosis | - Capture only mortality, not morbidity - Rely on referrals to and acceptance from medical examiners |
| Retrospective chart review based on clinical criteria | - Allow for deep dive into clinical and systems-based issues of misdiagnosis - Can produce automated electronic triggers and frameworks | - Rely on searchable clinical criteria (ex: vitals, laboratories) that may not be clear for complex diagnoses |
| Obstetric simulation and standardized patients | - Identify diagnoses with high error rates their root causes - Enable real-time feedback for clinicians and broader multidisciplinary teams | - Do not provide real-world data on cases or diagnostic error rates |
| Pregnancy-related case reviews (incident reporting and maternal mortality reviews) | - Yield thorough and individualized case reviews - Can situate diagnostic errors within complex systems | - Rely on reporting systems to identify cases for review - State boards typically review only deaths |
| Malpractice and administrative claims database queries | - Represent large datasets from a variety of hospitals - Allow for estimating financial impact of diagnostic harm | - Include few clinical case details - Lack information on systems-level issues associated with missed diagnoses |
